# Supplementary material
Source: publisher site journal article supplement (https://www.dovepress.com/article/485698)
Supplement: Supplementary file 1 [file get_supplementary_file.php]

Table S1 Relationship between systemic hemato-immunological indices indices and recurrence/residual CIN

| Exposure | Non-adjusted (HR, 95% CI, *P*) | Adjust II (HR, 95% CI, *P*) |
| --- | --- | --- |
| NLR | 0.92 (0.72, 1.19) 0.537 | 1.11 (0.88, 1.40) 0.390 |
| PLR | 0.99 (0.99, 1.00) 0.055 | 1.00 (0.99, 1.00) 0.340 |
| SII | 1.00 (1.00, 1.00) 0.177 | 1.00 (1.00, 1.00) 0.906 |

Non-adjusted model adjust for: None 
Adjust model adjust for NLR: Age; Pregnancy; Menopause; TCT; HPV; Degrees of CIN; Glandular involvement; Margin status
Adjust model adjust for PLR: TCT; Degrees of CIN; Margin status

Adjust model adjust for SII: Age; Pregnancy; TCT; HPV; Degrees of CIN; Glandular involvement; Margin status

Abbreviations: NLR: Neutrophil-to-Lymphocyte Ratio; PLR: Platelet-to-Lymphocyte Ratio; SII: Systemic Immune-Inflammation Index; CIN: Cervical Intraepithelial Neoplasia; HR: Hazard Ratio; CI: Confidence Interval; P: P-value; OR: Odds Ratio; TCT: ThinPrep Cytologic Test; HPV: Human Papillomavirus.

**Table S2** Threshold effect analysis of systemic hemato-immunological indices to recurrence/residual CIN using the two-piecewise Cox regression model with subgroup analysis

| **Age** | <50 (HR, 95% CI, *P*) | | >=50 (HR, 95% CI, *P*) | | | Total (HR, 95% CI, *P*) | | |
| --- | --- | --- | --- | --- | --- | --- | --- | --- |
| Fitting model by standard linear regression |  | |  | | | P-interaction: 0.013 | | |
|  | 0.70 (0.47, 1.03) 0.0723 | | 1.20 (1.00, 1.45) 0.0507 | | | 0.94 (0.73, 1.21) 0.6176 | | |
| Fitting model by two-piecewise cox regression |  | |  | | | P-interaction: 0.471 | | |
| Inflection point of NLR | 2.32 | | 1.86 | | | 2.93 | | |
| < Inflection point | 0.52 (0.27, 1.01) 0.0522 | | 0.16 (0.05, 0.56) 0.0040 | | | 0.50 (0.33, 0.76) 0.0014 | | |
| > Inflection point | 0.93 (0.54, 1.58) 0.7813 | | | 1.35 (1.14, 1.58) 0.0003 | | | 1.34 (1.13, 1.59) 0.0007 | |
| Log likelihood ratio | 0.283 | | | 0.002 | | | <0.001 | |
| **Pregnancy** | <3 (HR, 95% CI, *P*) | | | ≥3 (HR, 95% CI, *P*) | | | Total (HR, 95% CI, *P*) | |
| Fitting model by standard linear regression |  | | |  | | | P-interaction: 0.231 | |
|  | 0.81 (0.49, 1.34) 0.4198 | | | 1.25 (0.98, 1.59) 0.0739 | | | 1.10 (0.87, 1.40) 0.4181 | |
| Fitting model by two-piecewise linear regression |  | | |  | | | P-interaction: 0.581 | |
| Inflection point of NLR | 2.71 | | | 3.61 | | | 3.15 | |
| < Inflection point | 0.51 (0.26, 1.00) 0.0491 | | | 0.65 (0.35, 1.22) 0.1836 | | | 0.65 (0.43, 1.00) 0.0492 | |
| > Inflection point | 2.35 (0.97, 5.70) 0.0589 | | | 1.60 (1.24, 2.06) 0.0003 | | | 1.53 (1.24, 1.89) <0.0001 | |
| Log likelihood ratio | 0.037 | | | 0.020 | | | 0.003 | |
| **Parity** | <2 (HR, 95% CI, *P*) | | | ≥2 (HR, 95% CI, *P*) | | | Total (HR, 95% CI, *P*) | |
| Fitting model by standard linear regression |  | | |  | | | P-interaction: 0.126 | |
|  | 0.60 (0.23, 1.51) 0.2763 | | | 1.20 (0.95, 1.51) 0.1204 | | | 1.10 (0.87, 1.40) 0.4181 | |
| Fitting model by two-piecewise linear regression |  | | |  | | | P-interaction: 0.740 | |
| Inflection point of NLR | 1.27 | | | 3.05 | | | 3.15 | |
| < Inflection point 1 | 0.00 (0.00, 0.19) 0.0063 | | | 0.68 (0.41, 1.14) 0.1443 | | | 0.65 (0.43, 1.00) 0.0492 | |
| > Inflection point 2 | 0.87 (0.40, 1.90) 0.7280 | | | 1.49 (1.21, 1.84) 0.0002 | | | 1.53 (1.24, 1.89) <0.0001 | |
| Log likelihood ratio | 0.020 | | | 0.014 | | | 0.003 | |
| **Menopause** | No (HR, 95% CI, *P*) | | | Yes (HR, 95% CI, *P*) | | | Total (HR, 95% CI, *P*) | |
| Fitting model by standard linear regression |  | | |  | | | P-interaction: 0.160 | |
|  | 0.89 (0.58, 1.37) 0.5867 | | | 1.21 (0.91, 1.59) 0.1883 | | | 1.10 (0.87, 1.40) 0.4181 | |
| Fitting model by two-piecewise linear regression |  | | |  | | | P-interaction: 0.747 | |
| Inflection point of NLR | 1.17 | | | 3.04 | | | 3.15 | |
| < Inflection point 1 | 0.00 (0.00, 0.23) 0.0090 | | | 0.41 (0.18, 0.90) 0.0255 | | | 0.65 (0.43, 1.00) 0.0492 | |
| > Inflection point 2 | 1.01 (0.67, 1.52) 0.9476 | | | 1.61 (1.25, 2.07) 0.0002 | | | 1.53 (1.24, 1.89) <0.0001 | |
| Log likelihood ratio | 0.028 | | | 0.003 | | | 0.003 | |
| **TCT** | <ASC-H (HR, 95% CI, *P*) | | | ≥ASC-H (HR, 95% CI, *P*) | | | Total (HR, 95% CI, *P*) | |
| Fitting model by standard linear regression |  | | |  | | | P-interaction: 0.001 | |
|  | 1.50 (1.20, 1.86) 0.0003 | | | 0.63 (0.36, 1.11) 0.1084 | | | 1.10 (0.87, 1.40) 0.4181 | |
| Fitting model by two-piecewise linear regression |  | | |  | | | P-interaction: 0.082 | |
| Inflection point of NLR | 3.35 | | | 1.11 | | | 3.15 | |
| < Inflection point 1 | 0.79 (0.45, 1.40) 0.4278 | | | 0.08 (0.00, 40.13) 0.4256 | | | 0.65 (0.43, 1.00) 0.0492 | |
| > Inflection point 2 | 1.85 (1.44, 2.39) <0.0001 | | | 0.66 (0.38, 1.15) 0.1405 | | | 1.53 (1.24, 1.89) <0.0001 | |
| Log likelihood ratio | 0.014 | | | 0.531 | | | 0.003 | |
| **HPV** | No HR-HPV  (HR, 95% CI, *P*) | HPV16/18  (HR, 95% CI, *P*) | | | Other HR HPV  (HR, 95% CI, *P*) | | | Total  (HR, 95% CI, *P*) |
| Fitting model by standard linear regression |  |  | | |  | | | P-interaction: 0.003 |
|  | 0.02 (0.00, Inf) 0.9999 | 0.72 (0.49, 1.05) 0.0853 | | | 2.23 (1.35, 3.66) 0.0016 | | | 1.10 (0.87, 1.40) 0.4181 |
| Fitting model by two-piecewise linear regression |  |  | | |  | | | P-interaction: 0.272 |
| Inflection point of NLR | 0.95 | 2.77 | | | 2.85 | | | 3.15 |
| < Inflection point 1 | 0.00 (0.00, Inf) 0.9998 | 0.62 (0.37, 1.04) 0.0699 | | | 0.03 (0.00, 0.64) 0.0257 | | | 0.65 (0.43, 1.00) 0.0492 |
| > Inflection point 2 | 26.23 (0.00, Inf) 0.9999 | 0.94 (0.49, 1.81) 0.8628 | | | 37859.35 (3.35, inf.) 0.0268 | | | 1.53 (1.24, 1.89) <0.0001 |
| Log likelihood ratio | 1.000 | 0.424 | | | 0.002 | | | 0.003 |
| **Degrees of CIN** | CIN2 (HR, 95% CI, *P*) | | | CIN3 (HR, 95% CI, *P*) | | | Total (HR, 95% CI, *P*) | |
| Fitting model by standard linear regression |  | | |  | | | P-interaction: 0.342 | |
|  | 0.96 (0.44, 2.08) 0.9178 | | | 1.08 (0.84, 1.39) 0.5496 | | | 1.10 (0.87, 1.40) 0.4181 | |
| Fitting model by two-piecewise linear regression |  | | |  | | | P-interaction: 0.672 | |
| Inflection point of NLR | 1.2 | | | 3.47 | | | 3.15 | |
| < Inflection point 1 | 0.00 (0.00, 3.33) 0.0869 | | | 0.56 (0.35, 0.88) 0.0133 | | | 0.65 (0.43, 1.00) 0.0492 | |
| > Inflection point 2 | 1.13 (0.54, 2.33) 0.7509 | | | 1.73 (1.35, 2.21) <0.0001 | | | 1.53 (1.24, 1.89) <0.0001 | |
| Log likelihood ratio | 0.165 | | | <0.001 | | | 0.003 | |
| **Glandular involvement** | No (HR, 95% CI, *P*) | | | Yes (HR, 95% CI, *P*) | | | Total (HR, 95% CI, *P*) | |
| Fitting model by standard linear regression |  | | |  | | | P-interaction: 0.019 | |
|  | 0.62 (0.38, 1.00) 0.0496 | | | 1.34 (1.10, 1.64) 0.0041 | | | 1.10 (0.87, 1.40) 0.4181 | |
| Fitting model by two-piecewise linear regression |  | | |  | | | P-interaction: 0.182 | |
| Inflection point of NLR | 1.88 | | | 3.29 | | | 3.15 | |
| < Inflection point 1 | 0.34 (0.10, 1.21) 0.0960 | | | 0.64 (0.32, 1.30) 0.2213 | | | 0.65 (0.43, 1.00) 0.0492 | |
| > Inflection point 2 | 0.79 (0.43, 1.42) 0.4262 | | | 1.63 (1.29, 2.05) <0.0001 | | | 1.53 (1.24, 1.89) <0.0001 | |
| Log likelihood ratio | 0.325 | | | 0.024 | | | 0.003 | |
| **Margin status** | Negative (HR, 95% CI, *P*) | | | Positive (HR, 95% CI, *P*) | | | Total (HR, 95% CI, *P*) | |
| Fitting model by standard linear regression |  | | |  | | | P-interaction: 0.344 | |
|  | 1.12 (0.83, 1.51) 0.4756 | | | 0.99 (0.67, 1.47) 0.9588 | | | 1.10 (0.87, 1.40) 0.4181 | |
| Fitting model by two-piecewise linear regression |  | | |  | | | P-interaction: 0.055 | |
| Inflection point of NLR | 3.36 | | | 1.2 | | | 3.15 | |
| < Inflection point 1 | 0.16 (0.04, 0.61) 0.0072 | | | 0.04 (0.00, 1.25) 0.0667 | | | 0.65 (0.43, 1.00) 0.0492 | |
| > Inflection point 2 | 2.24 (1.42, 3.53) 0.0005 | | | 1.13 (0.76, 1.70) 0.5473 | | | 1.53 (1.24, 1.89) <0.0001 | |
| Log likelihood ratio | <0.001 | | | 0.087 | | | 0.003 | |

Age; Pregnancy; Parity；Menopause; TCT; HPV; Degrees of CIN; Glandular involvement; Margin status were adjusted.

Abbreviations: NLR: Neutrophil-to-Lymphocyte Ratio; CIN: Cervical Intraepithelial Neoplasia; HR: Hazard Ratio; CI: Confidence Interval; OR: Odds Ratio; TCT: ThinPrep Cytologic Test; HPV: Human Papillomavirus; HR: Hazard Ratio; CI: Confidence Interval. P value < 0.05 was considered significant.
